# Supplementary material for: Quantitative assessment of liver fibrosis (qFibrosis) reveals precise outcomes in Ishak “stable” patients on anti-HBV therapy
Source: PubMed Central journal article supplement (PMC5813020; doi:10.1038/s41598-018-21179-2), 2018-02-14
Supplement: 41598_2018_21179_MOESM1_ESM.pdf [file 41598_2018_21179_MOESM1_ESM.pdf]

---

## Title

**Quantitative assessment of liver fibrosis (qFibrosis) reveals precise outcomes in Ishak “stable” patients on anti-HBV therapy**

## Authors

Yameng Sun<sup>1</sup>, Jialing Zhou<sup>1</sup>, Xiaoning Wu<sup>1</sup>, Yongpeng Chen<sup>2</sup>, Hongxin Piao<sup>3</sup>, Lungen Lu<sup>4</sup>,  
Huiguo Ding<sup>5</sup>, Yuemin Nan<sup>6</sup>, Wei Jiang<sup>7</sup>, Tailing Wang<sup>8</sup>, Hui Liu<sup>9</sup>, Xiaojuan Ou<sup>1</sup>, Aileen Wee<sup>10</sup>,  
Neil D Theise<sup>11</sup>, **Jidong Jia<sup>1\*</sup>**, **Hong You<sup>1\*</sup>**

\* Authors share co-corresponding authorship.

## Affiliations

1. Liver Research Center, Beijing Key Laboratory of Translational Medicine in Liver Cirrhosis, National Clinical Research Center for Digestive Disease, Beijing Friendship Hospital, Capital Medical University, Beijing, 100050, China;
2. Department of Infectious Diseases, Nanfang Hospital, Southern Medical University, Guangzhou, 510515, China;
3. Infectious Disease Department, Affiliated Hospital of Yanbian University, Yanji, 133000, China;
4. Department of Gastroenterology and Hepatology, Shanghai General Hospital, Shanghai Jiaotong University School of Medicine, Shanghai, 200080, China;
5. Department of Gastroenterology and Hepatology, Beijing Youan Hospital, Capital Medical University, Beijing, 100069, China;

- 
6. Department of Traditional and Western Medical Hepatology, Third Hospital of Hebei Medical University, Shijiazhuang, 050051, China;
  7. Department of Gastroenterology, Zhongshan Hospital, Fudan University, Shanghai, 200032, China;
  8. Pathology Department, China-Japan Friendship Hospital, Beijing, 100029, China;
  9. Pathology Department, Beijing Youan Hospital, Capital Medical University, Beijing, 100069, China;
  10. Department of Pathology, Yong Loo Lin School of Medicine, National University of Singapore, National University Hospital, Singapore, 119074, Singapore;
  11. Department of Pathology, New York University School of Medicine, New York, NY, 10016, USA.

**\*Corresponding Author**

Hong You, MD, PhD

Jidong Jia, MD, PhD

Liver Research Center, Beijing Friendship Hospital, Capital Medical University

95 Yong-an Road, Xi-Cheng District, Beijing 100050, China

Tel: +86 010 63139019

Fax: +86 010 63038519

E-mail: youhong30@sina.com, [jia\\_jd@ccmu.edu.cn](mailto:jia_jd@ccmu.edu.cn)

Supplementary Table 1. Description of 15 collagen features selected for establishing qFibrosis.

| <b>Number</b> | <b>Feature</b> | <b>Description</b>                     |
|---------------|----------------|----------------------------------------|
| <b>1</b>      | Total CPA      | Total collagen percentage area         |
| <b>2</b>      | StrLength      | String Length                          |
| <b>3</b>      | StrWidth       | String Width                           |
| <b>4</b>      | StrSolidity    | String Solidity                        |
| <b>5</b>      | StrPerimeter   | String Perimeter                       |
| <b>6</b>      | PortalAGG      | Portal aggregated collagen percentage  |
| <b>7</b>      | PortalDIS      | Portal distributed collagen percentage |
| <b>8</b>      | NoStrP         | Number of Strings (Portal)             |
| <b>9</b>      | NoXlinkP       | Number of Crosslinks (Portal)          |
| <b>10</b>     | NoThickStrS    | Number of Thick Strings (Septal)       |
| <b>11</b>     | StrLengthS     | String length (Septal)                 |
| <b>12</b>     | NoXlinkS       | Number of Crosslinks (Septal)          |
| <b>13</b>     | Fibrillar      | Fibrillar Collagen Percentage          |
| <b>14</b>     | NoStrF         | Number of Strings (Fibrillar)          |
| <b>15</b>     | NoXlinkF       | Number of Crosslinks (Fibrillar)       |

**Supplementary Table 2. ROC analysis of  $\Delta$ qFibrosis for fibrosis regression**

| Changes of qFibrosis<br>(post-pretreatment) | Sensitivity<br>% | Specificity<br>% | PPV<br>% | NPV<br>% |
|---------------------------------------------|------------------|------------------|----------|----------|
| For prediction of fibrosis regression       |                  |                  |          |          |
| -0.1                                        | 88               | 46               | 55       | 84       |
| -0.2                                        | 88               | 47               | 55       | 85       |
| -0.3                                        | 81               | 50               | 54       | 78       |
| -0.4                                        | 75               | 53               | 54       | 78       |
| -0.5                                        | 71               | 57               | 55       | 73       |
| -0.6                                        | 62               | 61               | 54       | 69       |
| -0.7                                        | 58               | 65               | 55       | 67       |
| -0.8                                        | 52               | 69               | 55       | 66       |
| -0.9                                        | 46               | 75               | 58       | 65       |
| -1.0                                        | 43               | 76               | 58       | 65       |

Abbreviations: PPV, positive predictive value; NPV, negative predictive value.

**Supplementary Table 3 Characters associated with fibrosis regression and progression at baseline and after treatment.**

|                                | <b>Regression by Ishak<br/>or qFibrosis</b> | <b>Stable by qFibrosis</b> | <b>Progression by Ishak<br/>or qFibrosis</b> | <b><i>P</i> value</b> |
|--------------------------------|---------------------------------------------|----------------------------|----------------------------------------------|-----------------------|
| <b>Baseline</b>                |                                             |                            |                                              |                       |
| N (%)                          | 109 (67.3)                                  | 29 (17.9)                  | 24 (14.8)                                    | -                     |
| Age, year                      | 36 ± 11                                     | 36 ± 8                     | 39 ± 9                                       | 0.444                 |
| Gender (male), n (%)           | 83 (76.1)                                   | 23 (79.3)                  | 20 (83.3)                                    | 0.814                 |
| PLT, ×10 <sup>9</sup> /L       | 164.0 (123.3, 199.5)                        | 180.0 (132.8, 229.8)       | 159.0 (129.8, 208.5)                         | 0.515                 |
| ALT, U/L                       | 87.0 (46.5, 155.8)                          | 85.4 (37.6, 200.3)         | 61.5 (35.3, 98.2)                            | 0.295                 |
| AST, U/L                       | 53.5 (40.0, 95.0)                           | 54.7 (32.6, 107.0)         | 38.5 (27.8, 55.5)                            | 0.045                 |
| ALB, g/L                       | 42.5 (40.0, 45.6)                           | 43.8 (40.7, 46.8)          | 45.1 (40.6, 46.9)                            | 0.097                 |
| HBV DNA, Log IU/mL             | 6.8 (5.7, 7.9)                              | 6.9 (5.9, 7.7)             | 6.0 (4.4, 7.9)                               | 0.300                 |
| LSM, Kpa                       | 12.0 (8.1, 17.3)                            | 7.5 (6.7, 11.3)            | 8.6 (6.8, 12.5)                              | 0.002                 |
| qFibrosis                      | 3.3 (2.6, 4.3)                              | 2.6 (2.0, 3.3)             | 2.0 (1.7, 3.3)                               | <0.001                |
| Necroinflammation score, n (%) |                                             |                            |                                              | 0.001                 |
| 0-3, n=15                      | 6 (5.5)                                     | 3 (10.3)                   | 6 (25.0)                                     |                       |
| 4-6, n=68                      | 41 (37.6)                                   | 15 (51.7)                  | 12 (50.0)                                    |                       |
| 7-9, n=52                      | 37 (33.9)                                   | 11 (37.9)                  | 4 (16.7)                                     |                       |
| ≥10, n=27                      | 25 (22.9)                                   | 0                          | 2 (8.3)                                      |                       |
| Ishak score, n (%)             |                                             |                            |                                              | 0.001                 |
| 1, n=5                         | 2 (1.8)                                     | 0                          | 3 (12.5)                                     |                       |
| 2, n=35                        | 18 (16.5)                                   | 10 (34.5)                  | 7 (29.2)                                     |                       |
| 3, n=54                        | 31 (28.4)                                   | 15 (51.7)                  | 8 (33.3)                                     |                       |
| 4, n=43                        | 35 (32.1)                                   | 3 (10.3)                   | 5(20.8)                                      |                       |

|                                |                   |                   |                   |       |
|--------------------------------|-------------------|-------------------|-------------------|-------|
| 5, n=21                        | 20 (18.3)         | 0                 | 1 (4.2)           |       |
| 6, n=4                         | 3 (2.8)           | 1 (3.4)           | 0                 |       |
| <b>Post-treatment</b>          |                   |                   |                   |       |
| ALT, U/L                       | 24.0 (17.0, 33.0) | 28.0 (20.0, 39.0) | 32.5 (16.0, 42.4) | 0.230 |
| AST, U/L                       | 21.9 (18.0, 29.0) | 27.0 (20.5, 30.5) | 25.2 (21.5, 35.9) | 0.048 |
| ALB, g/L                       | 45.6 (43.2, 48.1) | 45.0 (43.0, 47.5) | 44.6 (42.4, 46.3) | 0.120 |
| HBV DNA, Log IU/mL             | 0 (0, 1.3)        | 0 (0, 1.3)        | 0 (0, 0)          | 0.871 |
| LSM, Kpa                       | 6.3 (5.2, 8.3)    | 6.5 (5.3, 9.0)    | 6.9 (6.1, 9.6)    | 0.227 |
| qFibrosis                      | 2.3 (1.9, 2.9)    | 2.5 (1.9, 3.4)    | 2.7 (2.4, 4.0)    | 0.013 |
| Necroinflammation score, n (%) |                   |                   |                   | 0.447 |
| 0-3, n=68                      | 49 (45.0)         | 12 (41.4)         | 7 (29.2)          |       |
| 4-6, n=91                      | 58 (53.2)         | 17 (58.6)         | 16 (66.7)         |       |
| 7-9, n=3                       | 2 (1.8)           | 0                 | 1 (4.2)           |       |
| ≥10, n=0                       | 0                 | 0                 | 0                 |       |
| Ishak score, n (%)             |                   |                   |                   | 0.084 |
| 0, n=3                         | 3 (2.8)           | 0                 | 0                 |       |
| 1, n=12                        | 12 (11.0)         | 0                 | 0                 |       |
| 2, n=47                        | 29 (26.6)         | 10 (34.5)         | 8 (33.3)          |       |
| 3, n=59                        | 36 (33.0)         | 15 (51.7)         | 8 (33.3)          |       |
| 4, n=23                        | 16 (14.7)         | 3 (10.3)          | 4 (16.7)          |       |
| 5, n=17                        | 13 (11.9)         | 0                 | 4 (16.7)          |       |
| 6, n=1                         | 0                 | 1 (3.4)           | 0                 |       |

**Figure Legend**

**Supplementary Figure 1.** Liver biopsy samples of CHB patients by SHG/TPEF morphometry at Ishak fibrosis stages 0-6.

CHB, chronic hepatitis B; SHG/TPEF, second harmonic generation/two photon excitation fluorescence.

**Supplementary Figure 2.** Dynamic changes of liver stiffness measurements in groups of (A) Fibrosis regression ( $\geq 1$ -point decrease by Ishak fibrosis score), (B) stable by Ishak score, (C) fibrosis progression ( $\geq 1$ -point increase by Ishak score) and the subclassified groups (D) *Regression by qFibrosis*, (E) *Stable by qFibrosis*”, (F) *Progression by qFibrosis*.

**Supplementary Figure 3.** Association between qFibrosis and liver stiffness pre- and post-treatment.
